# Supplementary material for: N2 Gas Flushing Alleviates the Loss of Bacterial Diversity and Inhibits Psychrotrophic Pseudomonas during the Cold Storage of Bovine Raw Milk
Source: PubMed Central journal article supplement (PMC4701220; doi:10.1371/journal.pone.0146015), 2016-01-05
Supplement: pone.0146015.s001.pdf [file pone.0146015.s001.pdf]

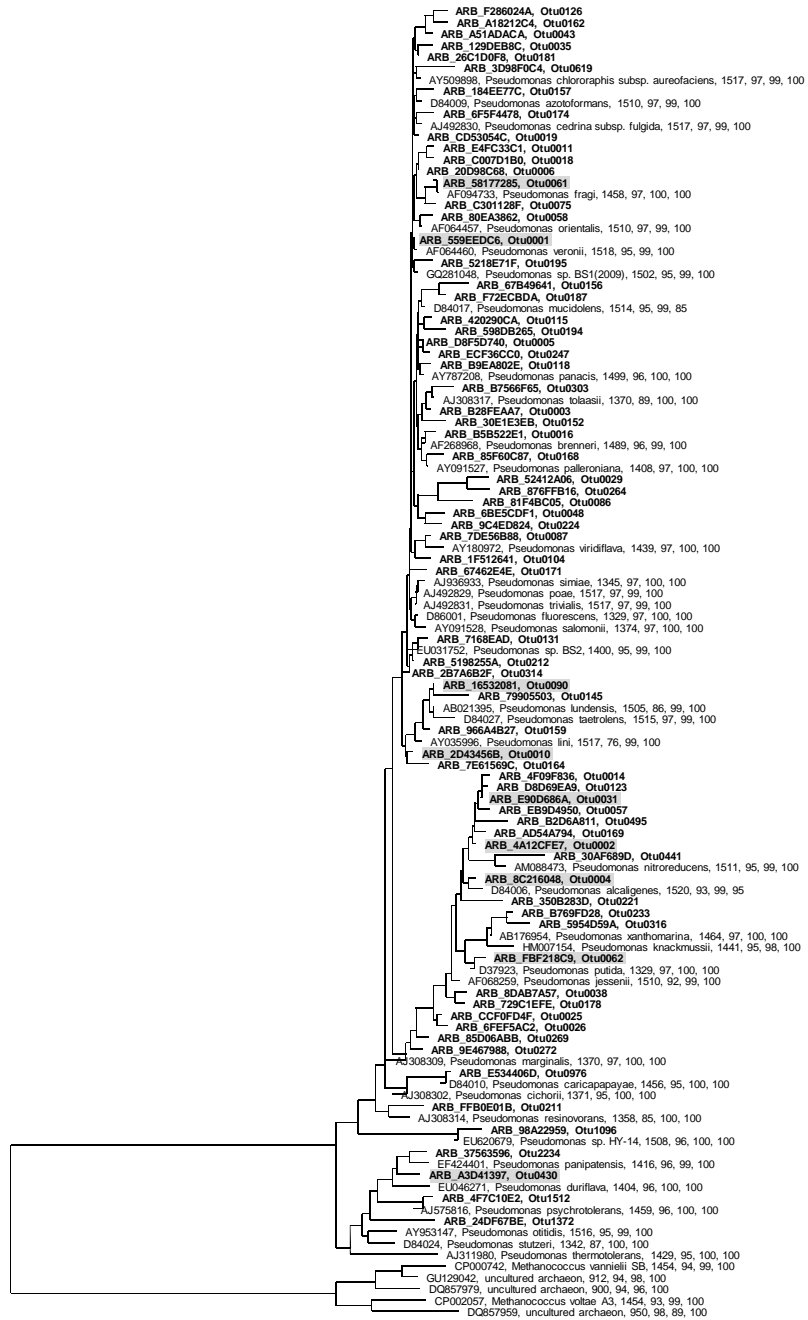

0.10
